# Supplementary material for: A ternary composite nanofiber-derived thin membrane electrolyte for solid-state Li metal batteries
Source: Royal Society of Chemistry journal article supplement (doi:10.1039/d4cc04550e), 2024-01-01
Supplement: d4cc04550e1.pdf [file d4cc04550e1.pdf]

## Supporting Information

### A Ternary Composite Nanofiber-Derived Thin Membrane Electrolyte for Solid-State Li Metal Batteries

Xiaoqi Gong,<sup>a†</sup> Yaozheng Pan,<sup>a†</sup> Linfeng Zhong,<sup>a</sup> Jiasheng Wang,<sup>b</sup> Fujie Liu,<sup>c</sup> Guangsheng Qi,<sup>b</sup> Jing Li,<sup>d</sup> Cong Liu<sup>\*a</sup> and Dingshan Yu<sup>\*a</sup>

- a. Key Laboratory for Polymeric Composite and Functional Materials of Ministry of Education, Key Laboratory of High-Performance Polymer-based Composites of Guangdong Province, School of Chemistry, Sun Yat-sen University, Guangzhou 510006, China.
- b. Guangzhou Lushan New Materials Co., Ltd, Guangzhou, China.
- c. School of Chemistry and Chemical Engineering, Guangxi Minzu University, Nanning, 530006, China.
- d. School of Chemical Engineering and Light Industry, Guangdong University of Technology, Guangzhou, China.

\* Corresponding author

Email addresses: liuc63@mail2.sysu.edu.cn (Cong Liu), yudings@mail.sysu.edu.cn (Dingshan Yu),

† These authors contributed equally to this work.

## **Experimental section**

### **Preparation of h-BN fillers**

In typical, 1 g of h-BN was dispersed in 200 mL of N, N-dimethylformamide (DMF) and sonicated for 8 h to obtain the dispersed solution. Subsequently, the supernatant was carefully poured into a separate beaker, leaving behind the bulk h-BN at the bottom. The resulting supernatant was centrifuged at 5000 rpm to collect the white detached h-BN nanosheets. Finally, the h-BN products were washed with deionized water and dried overnight at 80°C.

### **Preparation of solid-state electrolytes**

The electrospinning technique was employed for the fabrication of Poly(vinylidene fluoride-co-hexafluoropropylene) (PVH) skeleton. The electrospinning process entailed the preparation of a solution, in which 1.5 grams of PVH nanoparticles were dissolved in 10 g of DMF/acetone (7:3, v: v) and stirred for a period of 2 h at 60°C. The electrospinning solution was extruded and drawn through a syringe under high-voltage static electricity with a speed of 1 mL h<sup>-1</sup> and a voltage of 24 kV. The resulting PVH membrane was subjected to vacuum drying at 60°C for 4 h to remove the residual solvent, which was then stored for later use. A specific mass of polyethylene oxide (PEO) and LiTFSI (with a molar ratio of EO: Li<sup>+</sup> of 18:1) was added to anhydrous acetonitrile, which was then stirred at 55°C for 6 h to achieve a uniform dispersion. Subsequently, h-BN with varying mass fractions were added to the mixture, which was then subjected to continuous stirring for a further two hours. The prepared solution was poured onto the PVH substrate and vacuum dried at 55°C for 36 h to completely remove the acetonitrile solvent. The solid-state electrolytes with varying h-BN contents are designated as PEO, PEO/PVH, 0.2%h-BN@PEO/PVH, 0.4%h-BN@PEO/PVH, and 0.8%h-BN@PEO/PVH electrolytes, respectively.

### **Materials Characterizations**

Fourier transform infrared (FTIR) spectra were recorded via a FT-IR spectrometer (Thermo Nicolet Nexus 670). The crystalline structure of samples was investigated on X-

ray diffraction analysis (XRD, Rigaku Ultima IV) with Cu K $\alpha$  radiation (40 kV / 30 mA,  $\lambda = 0.154$  nm). The morphologies were characterized by Scanning electron microscopy (SEM, Hitachi S-4800) and Transmission electron microscopy (TEM, JEM-2010 HR). The X-ray photoelectron spectra (XPS) of samples were performed on a ESCALAB 250 photoelectron spectrometer (Thermo Fisher Scientific). The atomic force microscopy (AFM) examinations were conducted on Bruker Anasys nanoIR2-fs instrument. Nanoindentation technique (Fischer Scope, ST200) was applied to mimic the punctuation of Li dendrites at nanoscale. The tensile strength of the solid-state electrolytes was inspected using the universal testing machine (CMT6103, SANS).

### **Electrochemical tests**

An electrochemical test was conducted at 60 °C utilizing a coin cell comprising a Li-metal anode, the solid-state electrolyte and LiFePO<sub>4</sub> cathode. The high-loading LFP/LCO/NCM523 cathodes were fabricated by casting the slurry containing active material (80 mg), carbon black (10 mg), and PVDF (10 mg) with a high areal-loading of  $\sim 2$  mg cm<sup>-2</sup> on the Al foil. After drying at 60°C overnight, the electrode was cut into round discs with a diameter of 12 mm prior to use.

The ionic conductivity of the prepared solid-state electrolytes was determined by EIS technique using a symmetric coin cell with two stainless steel electrodes. The cells were performed with the frequency range from 10<sup>-2</sup> to 10<sup>5</sup> Hz and a voltage amplitude of 10 mV. The ionic conductivity ( $\sigma$ ) of the electrolyte was calculated using below equation, where  $R_b$  is the resistance ( $\Omega$ ), L represents the thickness (cm), and S stands for the area of the solid electrolyte (cm<sup>2</sup>):

$$\sigma = \frac{L}{R_b S}$$

The Li-ion transference number ( $t_{Li^+}$ ) of the solid-state electrolytes was measured in a symmetrical Li//Li cell. A voltage of 10 mV ( $\Delta V$ ) was applied and EIS spectra of the cell before and after polarization were obtained from 10<sup>-2</sup> to 10<sup>5</sup> Hz. The Li-ion transference number was determined based on the following equation:

$$t_{Li^+} = \frac{I_s(\Delta V - I_i R_i)}{I_i(\Delta V - I_s R_s)}$$

Where  $t_{Li^+}$ ,  $I_s$ ,  $I_i$ ,  $R_s$  and  $R_i$  are the Li-ion transference number, the current and the resistance at the final state and initial state, respectively.

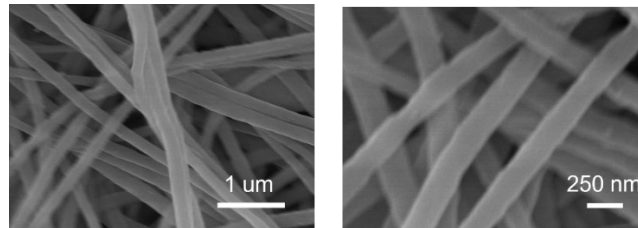

**Fig. S1** SEM images of PVH membrane of different sizes.

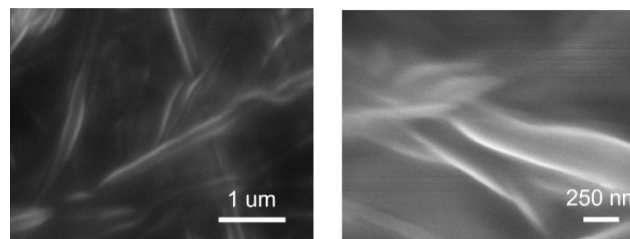

**Fig. S2** SEM images of the h-BN@PEO/PVH electrolyte of different sizes.

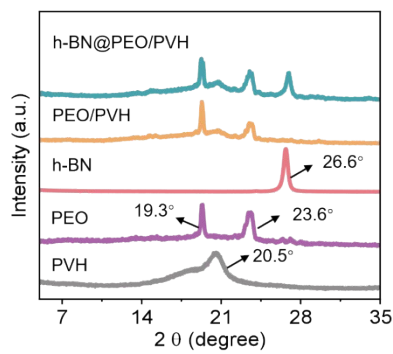

**Fig. S3** XRD patterns of h-BN fillers, PVH substrate, PEO, PEO/PVH and h-BN@PEO/PVH electrolytes.

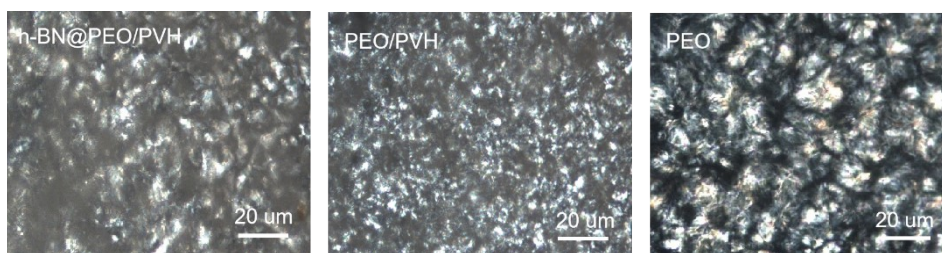

**Fig. S3** Polarization microscopies of h-BN@PEO/PVH, PEO/PVH and PEO electrolytes.

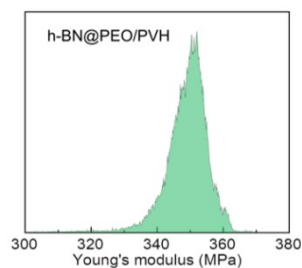

**Fig. S4** The distribution curve of Young's modulus collected from AFM image of h-BN@PEO/PVH electrolyte.

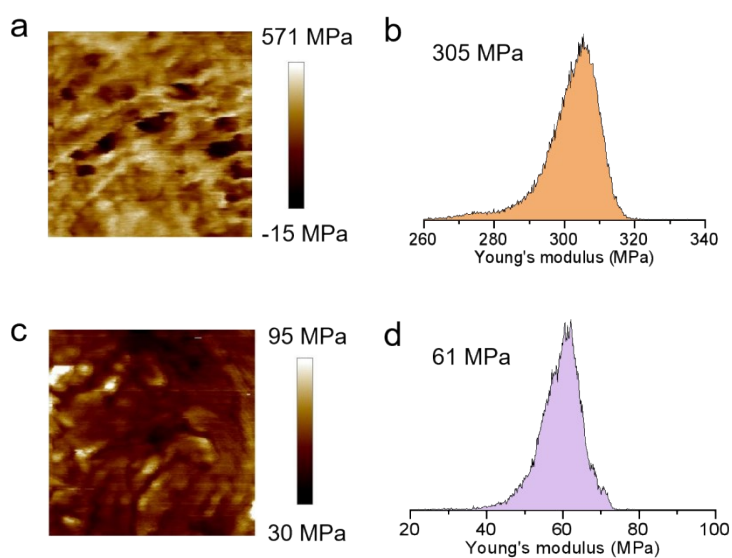

**Fig. S5** AFM images of Young's modulus and their distribution curves of (a, b) PEO/PVH and (c, d) PEO electrolytes.

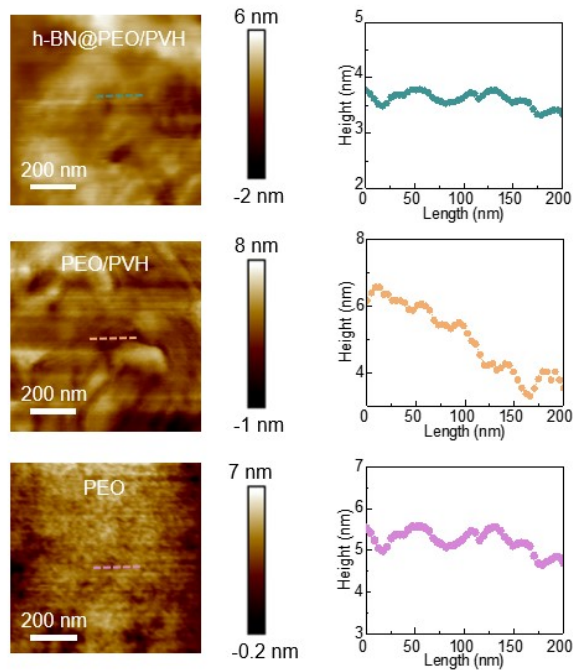

**Fig. S6** AFM images of the surface roughness on different electrolytes.

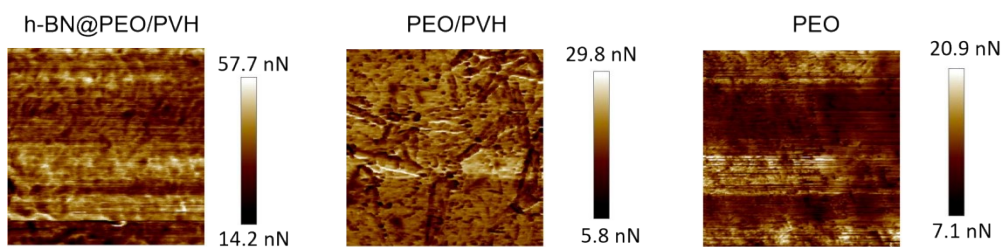

**Fig. S7** AFM images of the adhesion force on different electrolytes.

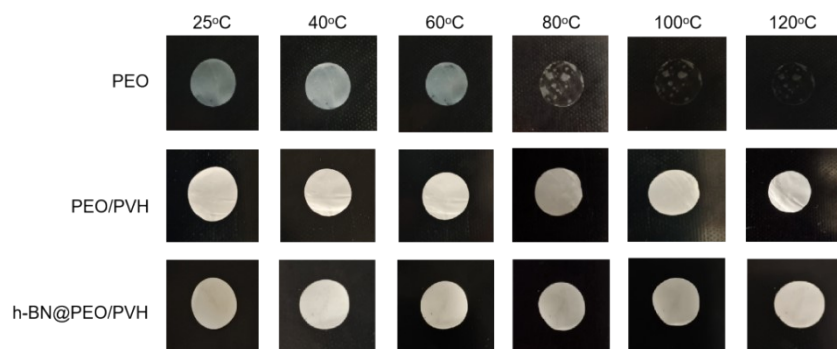

**Fig. S8** The thermal stability of PEO, PEO/PVH and h-BN@PEO/PVH electrolytes at different temperatures.

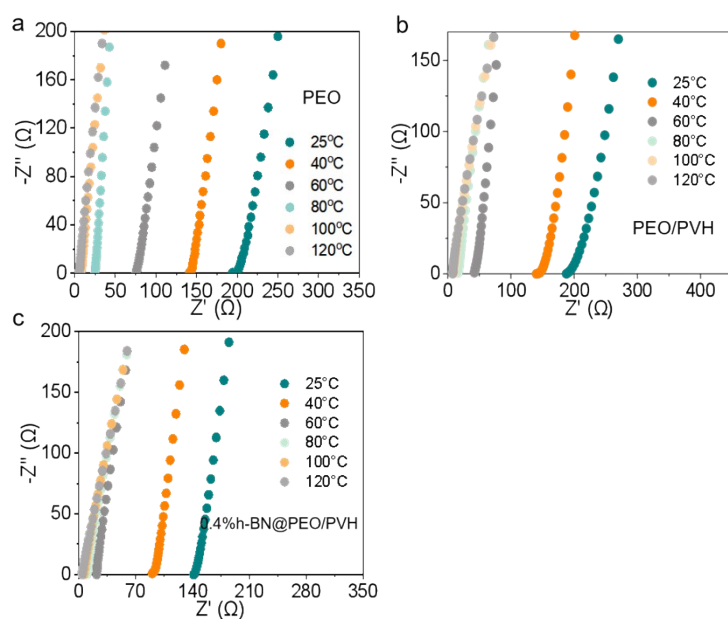

**Fig. S9** EIS curves of (a) PEO, (b) PEO/PVH and (c) 0.4%h-BN@PEO/PVH electrolytes. (d) The ionic conductivity at 60 °C of PEO, PEO/PVH and 0.4%h-BN@PEO/PVH electrolytes.

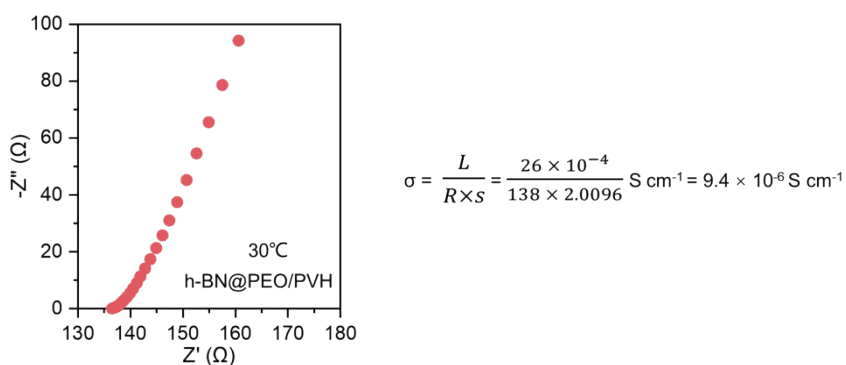

**Fig. S10** The ionic conductivity of h-BN@PEO/PVH electrolytes at 30 °C.

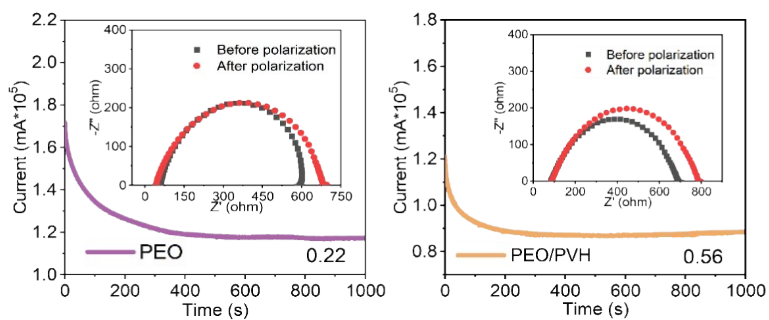

**Fig. S11** Li-ion transference number of PEO and PEO/PVH electrolytes at 60 °C.

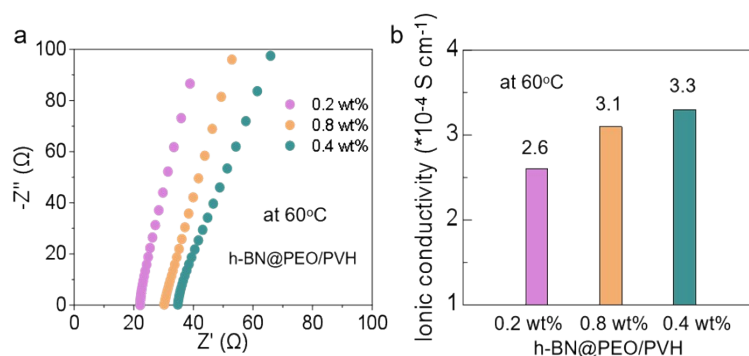

**Fig. S12** (a) EIS curves and (b) the ionic conductivities at 60 °C of h-BN@PEO/PVH electrolytes with different h-BN contents.

**Tab. S1** The comparison of the h-BN@PEO/PVH electrolyte with previously reported PEO-based electrolytes.

| Solid electrolyte        | Li-ion transference number | Filler content (wt%)       | Thickness ( $\mu\text{m}$ ) | Voltage window (V) | Ref.                                         |
|--------------------------|----------------------------|----------------------------|-----------------------------|--------------------|----------------------------------------------|
| h-BN@PEO/PVH             | 0.74 (60°C)                | h-BN (0.4%)                | ~ 26                        | 5.0                | This work                                    |
| PEO-ZCNF                 | 0.62 (60°C)                | ZCNF (10%)                 | ~ 150                       | 4.51               | Angew. Chem. 2024, 136, e202400477.          |
| LAZP/PEO                 | 0.43 (60°C)                | LAZP (20%)                 | ~ 150                       | 4.6                | Inorg. Chem. Front., 2024, 11, 1289.         |
| VCOF-PEO                 | 0.38 (60°C)                | VCOF-1 (4%)                | ~ 618                       | 4.0                | J. Mater. Chem. A 2024, 12, 1694.            |
| PEO-5%C4P                | 0.70 (60°C)                | C4P (5%)                   | ~ 110                       | 2.8                | Adv. Mater. 2023, 2308507.                   |
| PEO/MOFs-NH <sub>2</sub> | 0.64 (60°C)                | MOFs-NH <sub>2</sub> (10%) | ~ 100                       | 4.5                | Adv. Mater. 2023, 2303193.                   |
| PEO-BIT-BOB HNFs         | 0.54 (50°C)                | BIT-BOB HNFs (10%)         | ~ 120                       | 4.75               | Adv. Funct. Mater. 2023, 33, 2307263.        |
| PEO-LLZO                 | 0.41 (60°C)                | LLZO (7.5%)                | ~ 100                       | 5.3                | ACS Appl. Mater. Interfaces 2023, 15, 38759. |
| PEO-SCP                  | 0.42 (60°C)                | SCP (5%)                   | ~ 100                       | 4.8                | J. Mater. Chem. A 2022, 10, 14849.           |
| SiO <sub>2</sub> -PEO    | 0.42 (60°C)                | SiO <sub>2</sub> (10%)     | ~ 200                       | 5.3                | J. Mater. Chem. A 2022, 10, 3400.            |
